# Supplementary material
Source: PubMed Central journal article supplement (PMC10991601)
Supplement: 262_2020_2791_MOESM2_ESM.pdf [file 262_2020_2791_MOESM2_ESM.pdf]

Table S1 List of all primers

| Primer                    | Sequence (5' to 3')                                |
|---------------------------|----------------------------------------------------|
| OligodT Adapter:          | GCGAGCACAGAATTAATACGACTCACTATAGGTTTT<br>TTTTTTTTVN |
| Let-7d-F(forward primer)  | AGAGGTAGTAGGTTGCATAGTT                             |
| Let-7d-R (reverse primer) | GCGAGCACAGAATTAATACGAC                             |
| U6-F                      | CTCGCTTCGGCAGCACA                                  |
| U6-R                      | AACGCTTCACGAATTTGCGT                               |
| IL-10-F                   | TCCCTGTGAAAACAAGAGCA                               |
| IL-10-R                   | ATAGAGTCGCCACCCTGATG                               |
| IL-13-F                   | GCTTAGACCTCAGCCTGTGC                               |
| IL-13-R                   | GTTGCCTGTGTGTGAAGTGG                               |
| TNF- $\alpha$ -F          | TGTAGCAAACCCTCAAGCTG                               |
| TNF- $\alpha$ -R          | TTGATGGCAGAGAGGAGGTT                               |
| TGF- $\beta$ -F           | CAACAATTCCTGGCGATAACC                              |
| TGF- $\beta$ -R           | GAACCCGTTGATGTCCACTT                               |
| PIGF-F                    | ACCAAACCTCAAAGCATGGC                               |
| PIGF-R                    | TAGCCAAAGGTCGCTCCAAG                               |
| CD204-F                   | GGGAA CATTCTCAGACCTTG                              |
| CD204-R                   | AA TCCTCGTGGACCACTTTC                              |
| CD68-F                    | TCAGCTTTGGATTCATGCAGG                              |
| CD68-R                    | AAAGAATGATGCTCGAGTTGC                              |
| VEGF-F                    | AGGCCAGCACATAGGAGAGA                               |
| VEGF-R                    | ACGCGAGTCTGTGTTTTTGC                               |
| PDGFA-F                   | TGCGGTCTTTGTTCTCCTCC                               |
| PDGFA-R                   | TCTGGAGTCGTTCCCAAAGC                               |
| MMP-9-F                   | GGACAAGCTCTTCGGCTTCT                               |
| MMP-9-R                   | TTCAGGGCGAGGACCATAGA                               |
| PDGFB-F                   | TGTGCGGAAGAAGCCAATCT                               |
| PDGFB-R                   | CTAGGCTCCAAGGGTCTCCT                               |
| b-FGF-F                   | CTTCTCGAACCGCTGTGTCT                               |
| b-FGF-R                   | GGAAGTGCAGCCATGCAAAA                               |
| IL-1 $\beta$ -F           | ACGATGCACCTGTACGATCA                               |
| IL-1 $\beta$ -R           | TCTTTCAACACGCAGGACAG                               |
| IL-6-F                    | TACCCCAGGAGAAGATTCC                                |
| IL-6-R                    | TTTTCTGCCAGTGCCTCTTT                               |
| CD163-F                   | TGGACCGATATGGCTCAATG                               |
| CD163-R                   | AGCGACCTGTTGTGGCTTTT                               |
| CD206-F                   | GGGTTGCTATCACTCTCTATGC                             |
| CD206-R                   | TTTCTTGTCTGTTGCCGTAGTT                             |
| CD80-F                    | AAAGTGTACGCCCTGTATAACA                             |
| CD80-R                    | TGTGCCACCACATATTCC                                 |

|          |                        |
|----------|------------------------|
| CD86-F   | GAGGGAAGAGAGTGAACAGAC  |
| CD86-R   | GAGCAGAGCTGGAGTTACAG   |
| HLA-DR-F | GCCCAACCTGGAAATCATGACA |
| HLA-DR-R | AGGGCTGTTGTGAGCACA     |
| CCL22-F  | CGAGGAAGAGGT TCGGTCACC |
| CCL22-R  | CAT CTCACCCAGGGCACTCT  |
| GAPDH-F  | AATCCCATCACCATCTTCCA   |
| GAPDH-R  | TGGACTCCACGACGTACTCA   |

**Figure S1. Downregulation of let-7d was associated with lymphatic metastasis and poor prognosis in RCC.** (A) Relative let-7d expression in normal kidney tissues and RCC tissues from TCGA RCC (KIRC, KIRP, KICH) dataset. (B) Relative let-7d expression between N1 and N0 stage from TCGA RCC dataset. Horizontal lines in (A-B) represent the median value of let-7d expression. RPM, reads per million. (C) Kaplan-Meier curves of overall survival (OS) time between high and low let-7d group using Log-rank (Mantel-Cox) test in 71 ccRCC patients from TCGA KIRC dataset. Cutoff value as indicated. The TCGA RCC RNA-Seq gene expression data and the clinical data were downloaded from the UCSC Xena database (<http://xena.ucsc.edu/>). (D) A linear regression and correlation in data from qRT-PCR vs. MVD in RCC tissue from 80 patients in our institute was shown with r (spearman) and P-values indicated. Expression status was shown in a log scale.

**Figure S2. Quantitative RT-PCR analyses of the expression of angiogenic factors in the M0 macrophages cocultured with let-7d-overexpressing or control RCC cells.** (A) Expression of VEGF, PDGFA, PDGFB, bFGF and MMP-9 in M0 macrophages cocultured with let-7d-overexpressing or control 786O cells. (B) Expression of VEGF, PDGFA, PDGFB, bFGF and MMP-9 in M0 macrophages cocultured with let-7d-overexpressing or control 769P cells. The mRNA expression was normalized to GAPDH mRNA. The data represented the mean  $\pm$  SD of three independent RT-PCRs (RNAs were from the same set). Different numbers between two groups were analyzed by two-tailed Student's t test. \*p<0.05.

**Figure S3. Upregulation of CD68 and CD204 was associated with high stage of the disease and poor prognosis in RCC.** (A) Relative CD68 mRNA expression level in normal kidney tissues and RCC tissues from TCGA RCC (KIRC, KIRP, KICH) dataset. (B) Relative CD68 mRNA expression level in different stage of the disease from TCGA RCC dataset. (C) Kaplan-Meier curves of overall survival (OS) time between high and low CD68 expression group using Log-rank (Mantel-Cox) test in 174 RCC patients from TCGA RCC dataset. Cutoff value for high group: 90<sup>th</sup> percentile, low group: 10<sup>th</sup> percentile (total n=864). (D) Relative CD204 mRNA expression level in normal kidney tissues and RCC tissues from TCGA RCC (KIRC, KIRP, KICH) dataset. (E) Relative CD204 mRNA expression level in different stage of the disease from TCGA RCC dataset. (F) Kaplan-Meier curve of overall survival (OS) time between high and low CD204 (MSR1) expression group using Log-rank (Mantel-Cox) test in 88 RCC patients from TCGA RCC dataset. Cutoff value for high group: 95<sup>th</sup> percentile, low group: 5<sup>th</sup> percentile (total n=864). (G)

The linear regression and correlation between CD 68 mRNA expression and CD 31 mRNA expression in TCGA RCC dataset. (H) The linear regression and correlation between CD 204 mRNA expression and CD 31 mRNA expression in TCGA RCC dataset. Horizontal lines in (A, B, D, E) represent the median value of mRNA expression. The TCGA RCC RNA-Seq gene expression data and the clinical data were downloaded from the UCSC Xena database (<http://xena.ucsc.edu/>). Survival plots in C and F were obtained using the GEPIA web server (<http://gepia.cancer-pku.cn/detail.php>). FPKM, fragments per kilobase million. TMP, transcripts per million.
