# Supplementary material
Source: PubMed Central journal article supplement (PMC10991601)

**A**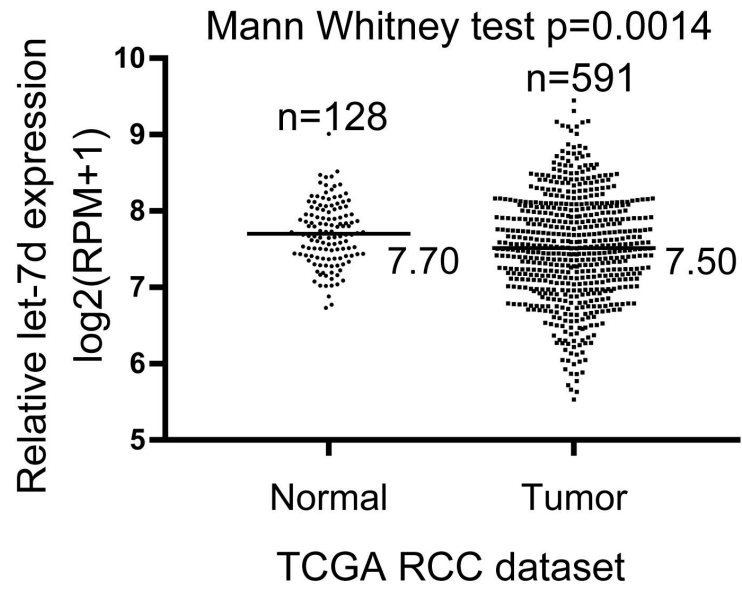**B**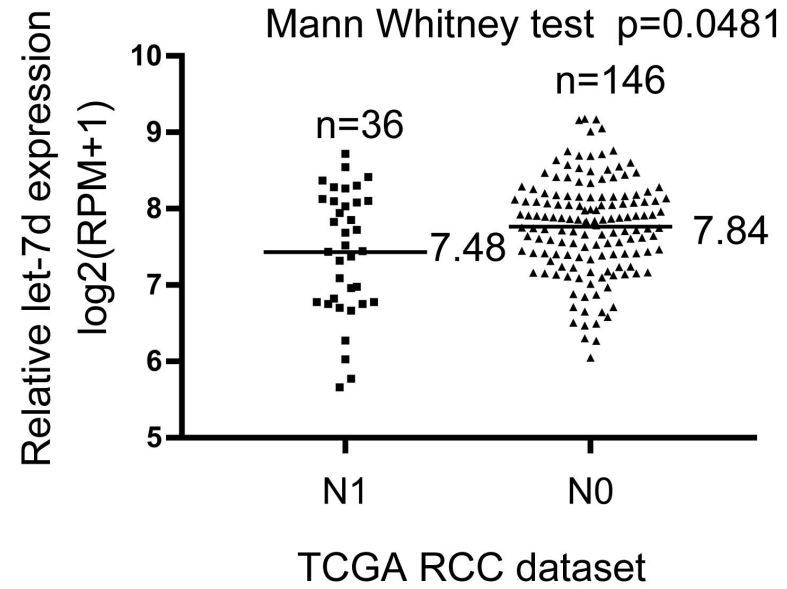**C**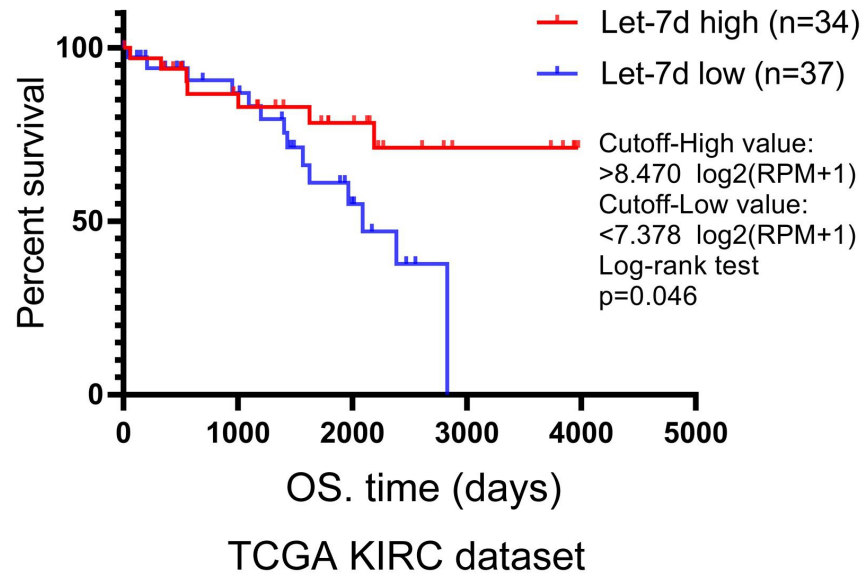**D**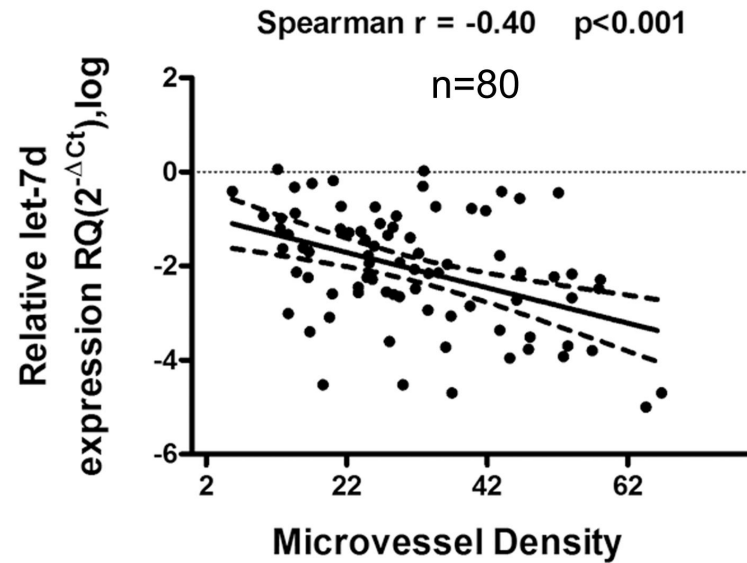

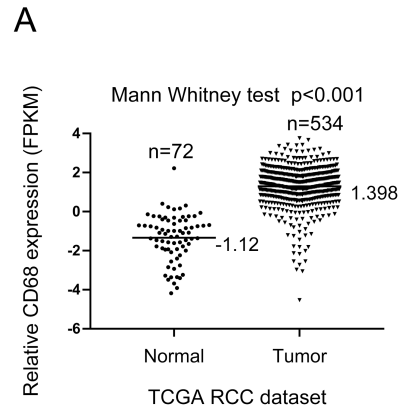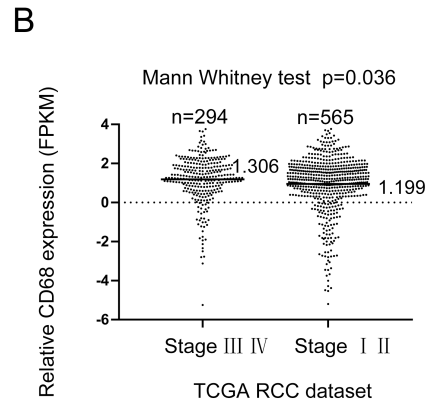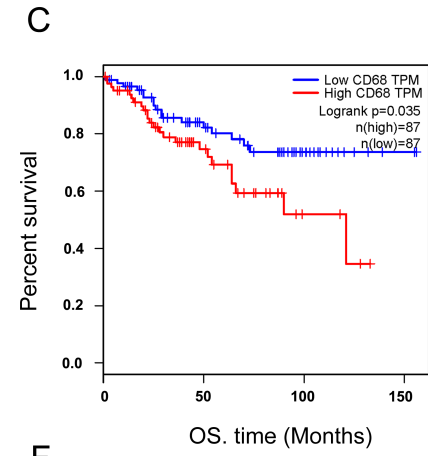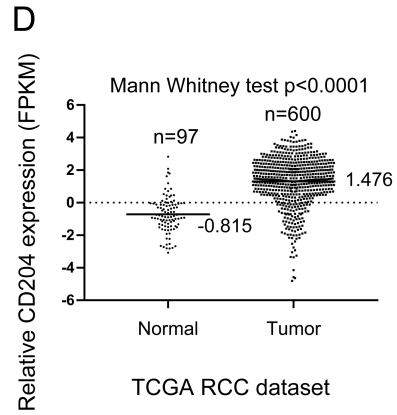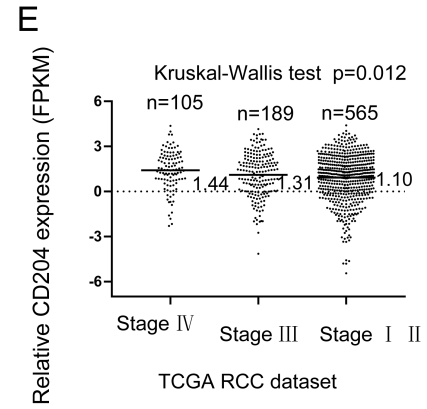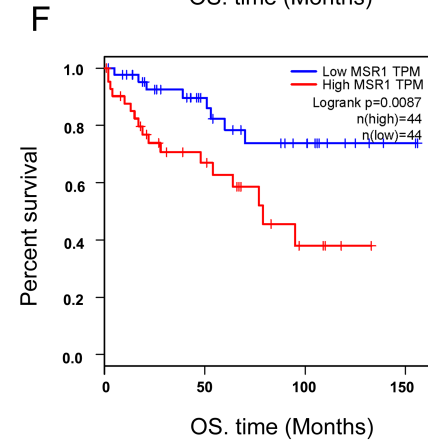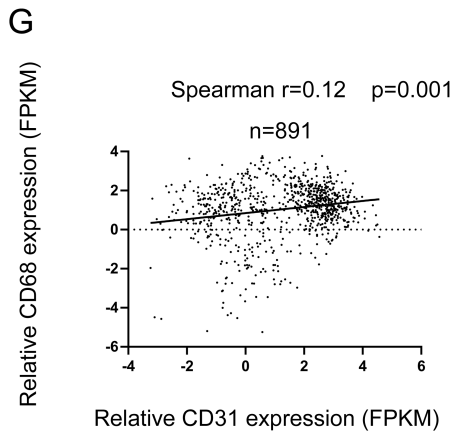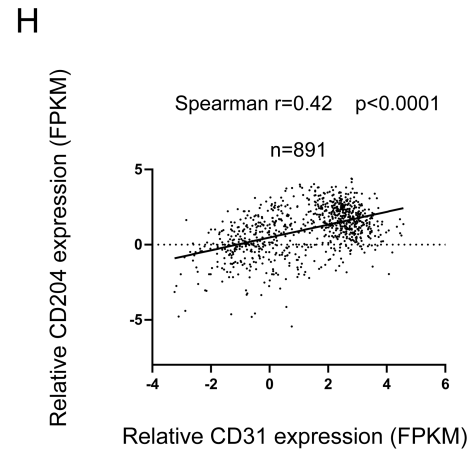

**A**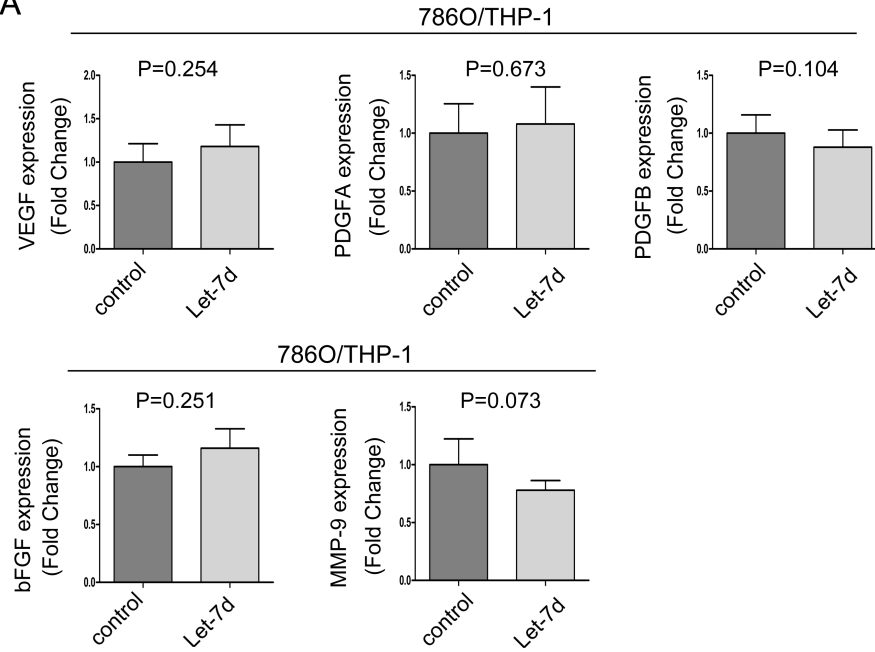**B**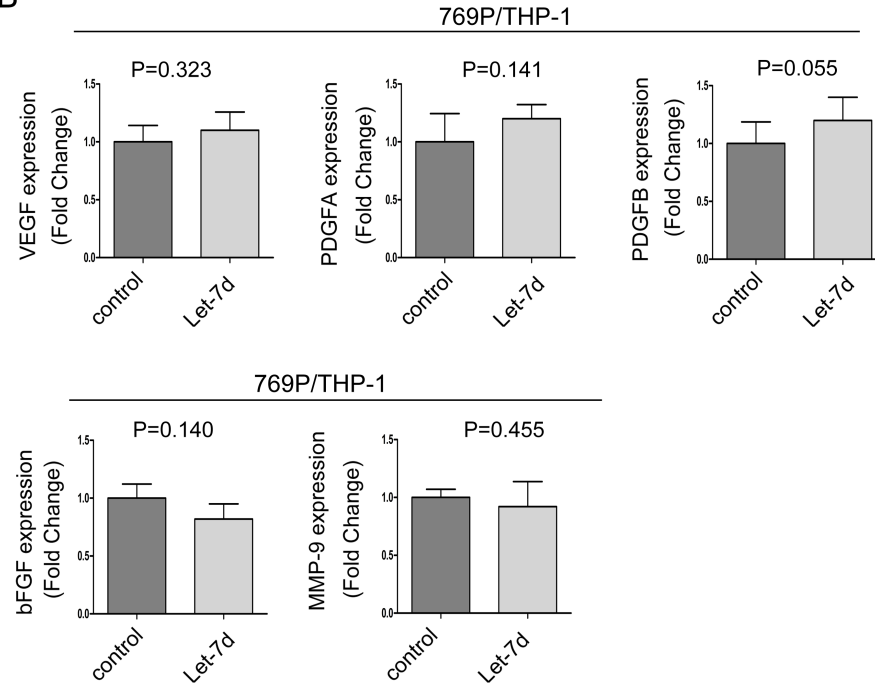

Supplement: 262_2020_2791_MOESM1_ESM.pdf [file 262_2020_2791_MOESM1_ESM.pdf]
